# Supplementary material for: Surface-enhanced Raman spectroscopy hair analysis after household contamination
Source: Royal Society of Chemistry journal article supplement (doi:10.1039/d3ay01219k), 2023-01-01
Supplement: d3ay01219k1.pdf [file d3ay01219k1.pdf]

# Surface-Enhanced Raman Spectroscopy Hair Analysis after Household Contamination

Isaac Juarez<sup>1</sup>, Dmitry Kurouski<sup>1,2\*</sup>

1. Department of Toxicology, Texas A&M University, College Station, Texas 77843, United States
2. Department of Biochemistry and Biophysics, Texas A&M University, College Station, Texas 77843, United States

## Supporting Information

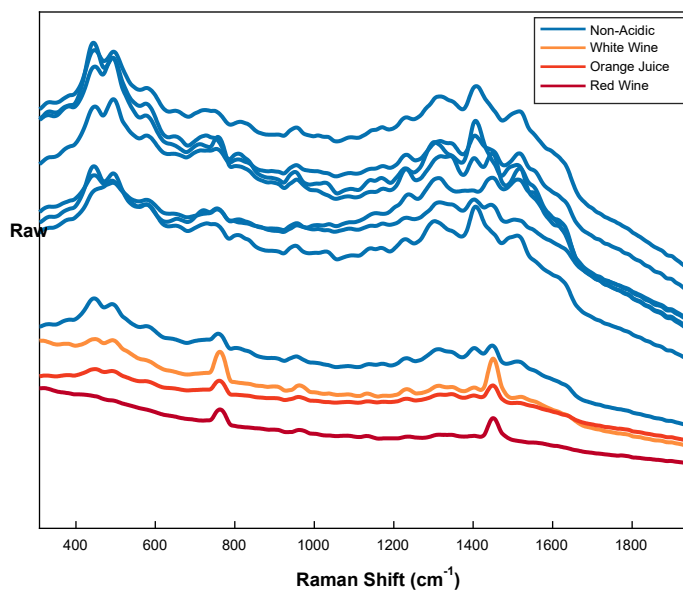

**Figure S1:** Raw SERS spectra of cleaned PBlk colored hair with acidic contaminants highlighted.
